# Supplementary material for: Hierarchical V4C3TX@NiO-reduced graphene oxide heterostructure hydrogels and defective reduced graphene oxide hydrogels as free-standing anodes and cathodes for high-performance asymmetric supercapacitors
Source: Royal Society of Chemistry journal article supplement (doi:10.1039/d3cp00595j), 2023-01-01
Supplement: d3cp00595j1.pdf [file d3cp00595j1.pdf]

Supporting Information

**Hierarchical  $V_4C_3T_x@NiO$ -reduced graphene oxide heterostructure hydrogel and defective reduced graphene oxide hydrogel as free-standing anode and cathode for high-performance asymmetric supercapacitor**

Ziyu Geng<sup>a</sup>, Weiwen Chen<sup>a,b</sup>, Zenghui Qiu<sup>a,b,\*</sup>, Haijun Xu<sup>a,b,\*</sup>, Dingjie Pan<sup>c</sup>, and Shaowei Chen<sup>c,\*</sup>

<sup>a</sup>*College of Mathematics & Physics, Beijing University of Chemical Technology, Beijing 100029, China*

<sup>b</sup>*Beijing Bioprocess Key Laboratory, Beijing University of Chemical Technology, Beijing 100029, China*

<sup>c</sup>*Department of Chemistry and Biochemistry, University of California, 1156 High Street, Santa Cruz, CA, 95064, United States*

*#These authors contributed equally to the work.*

*\*E-mail: zhqiu@buct.edu.cn (Z.H.Q.), hjxu@buct.edu.cn (H.J.X.), and shaowei@ucsc.edu (S.W.C.)*

**List of Contents**

- 2 tables

**Table S1.** Comparison of specific capacitance of  $Ti_3C_2T_x$ -based heterostructured electrodes.

| Materials                                       | Electrolyte                        | Specific capacitance | Current density or Scan rate | Ref.      |
|-------------------------------------------------|------------------------------------|----------------------|------------------------------|-----------|
| $Ti_3C_2T_x/CNF/PC$                             | 1 M KOH                            | 143 mF $cm^{-2}$     | 0.1 mA $cm^{-2}$             | [1]       |
| N,O co-doped $C@Ti_3C_2T_x$                     | 6 M KOH                            | 250.6 F $g^{-1}$     | 1 A $g^{-1}$                 | [2]       |
| $Ti_3C_2T_x/ZIF-67/CoV_2O_6$                    | 1 M KOH                            | 285.5 F $g^{-1}$     | 1 A $g^{-1}$                 | [3]       |
| 1T-MoS <sub>2</sub> / $Ti_3C_2T_x$              | 1 M H <sub>2</sub> SO <sub>4</sub> | 386.7 F $g^{-1}$     | 1 A $g^{-1}$                 | [4]       |
| MnO <sub>2</sub> / $Ti_3C_2T_x/CC$              | 1 M LiCl                           | 411.5 F $g^{-1}$     | 1 A $g^{-1}$                 | [5]       |
| PPy/ $Ti_3C_2T_x$                               | 1 M H <sub>2</sub> SO <sub>4</sub> | 458 F $g^{-1}$       | 2 mV $s^{-1}$                | [6]       |
| $Ti_3C_2T_x@PDA/NiCo_2S_4$                      | 3 M KOH                            | 495 F $g^{-1}$       | 2 mV $s^{-1}$                | [7]       |
| 400-KOH- $Ti_3C_2T_x$                           | 1 M H <sub>2</sub> SO <sub>4</sub> | 517 F $g^{-1}$       | 1 A $g^{-1}$                 | [8]       |
| $Ti_3C_2T_x/NF$                                 | 6 M KOH                            | 654 F $g^{-1}$       | 1 A $g^{-1}$                 | [9]       |
| MXene/rGO                                       | 3 M H <sub>2</sub> SO <sub>4</sub> | 1040 F $cm^{-3}$     | 2 mV $s^{-1}$                | [10]      |
| Co <sub>2</sub> NiO <sub>4</sub> / $Ti_3C_2T_x$ | 3 M KOH                            | 719.5 F $g^{-1}$     | 0.5 A $g^{-1}$               | [11]      |
| $Ti_3C_2/Ni-Co-Al-LDH$                          | 1 M KOH                            | 748.2 F $g^{-1}$     | 1 A $g^{-1}$                 | [12]      |
| $Ti_3C_2T_x@NiO-RGO$                            | 1 M KOH                            | 966 F $g^{-1}$       | 1 A $g^{-1}$                 | [13]      |
| $V_4C_3T_x@NiO-RGO$                             | 1 M KOH                            | 1014.5 F $g^{-1}$    | 1 A $g^{-1}$                 | This work |

**Table S2** Comparison of specific capacitance for various carbon materials in aqueous electrolytes reported in the literature.

| Material             | Electrolyte                        | Specific capacitance (F g <sup>-1</sup> ) | Current density (A g <sup>-1</sup> ) <sup>1)</sup> | Ref.      |
|----------------------|------------------------------------|-------------------------------------------|----------------------------------------------------|-----------|
| NG-900               | 6 M KOH                            | 130                                       | 0.5                                                | [14]      |
| aNG                  | 1 M KOH                            | 132.4                                     | 0.1                                                | [15]      |
| TsG                  | 6 M KOH                            | 180                                       | 0.5                                                | [16]      |
| AC800NH <sub>3</sub> | 6 M KOH                            | 196                                       | 1                                                  | [17]      |
| LSG                  | 1 M H <sub>3</sub> PO <sub>4</sub> | 202                                       | 1                                                  | [18]      |
| HPCFs                | 6 M KOH                            | 206                                       | 1                                                  | [19]      |
| C-900                | 6 M KOH                            | 210                                       | 1                                                  | [20]      |
| PANecoal-            | 6 M KOH                            | 230                                       | 1                                                  | [21]      |
| AC <sub>5</sub>      | 7 M KOH                            | 232                                       | 0.05                                               | [22]      |
| AC800                | 6 M KOH                            | 335                                       | 0.1                                                | [23]      |
| N-HPCs               | 1 M KOH                            | 245                                       | 1                                                  | [24]      |
| PCPs                 | 1 M KOH                            | 258                                       | 1                                                  | This work |
| DRGO                 |                                    |                                           |                                                    |           |

## References

- [1] Chen, W. M.; Zhang, D. T.; Yang, K.; Luo, M.; Yang, P.; Zhou, X. Y. MXene ( $\text{Ti}_3\text{C}_2\text{T}_x$ )/cellulose nanofiber/porous carbon film as free-standing electrode for ultrathin and flexible supercapacitors. *Chemical Engineering Journal*. **2021**, 413, 127524.
- [2] Pan, Z. H.; Ji, X. H. Facile synthesis of nitrogen and oxygen co-doped  $\text{C}@\text{Ti}_3\text{C}_2$  MXene for high performance symmetric supercapacitors. *Journal of Power Sources*. **2019**, 439, 227068.
- [3] Liu, C. L.; Bai, Y.; Li, W. T.; Yang, F. Y.; Zhang, G. X.; Pang, H. In Situ Growth of Three-Dimensional MXene/Metal–Organic Framework Composites for High-Performance Supercapacitors. *Angew Chem Int Ed Engl*. **2022**, 61, e202116282.
- [4] Wang, X.; Li, H.; Li, H.; Lin, S.; Ding, W.; Zhu, X. G.; Sheng, Z. G.; Wang, H.; Zhu, X. B.; Sun, Y. P. 2D/2D 1T-MoS<sub>2</sub>/Ti<sub>3</sub>C<sub>2</sub> MXene Heterostructure with Excellent Supercapacitor Performance. *Advanced Functional Materials*. **2020**, 30, 0190302.
- [5] Chen, X. H.; Liu, Y.; Zhou, Q.; Su, F. H. Facile Synthesis of MnO<sub>2</sub>/Ti<sub>3</sub>C<sub>2</sub>T<sub>x</sub>/CC as Positive Electrode of All-Solid-State Flexible Asymmetric Supercapacitor. *ChemistrySelect*. **2020**, 5, 14768-14775.
- [6] Wei, D.; Wu, W. L.; Zhu, J. F.; Wang, C. W.; Zhao, C. H.; Wang, L. A facile strategy of polypyrrole nanospheres grown on Ti<sub>3</sub>C<sub>2</sub>-MXene nanosheets as advanced supercapacitor electrodes. *Journal of Electroanalytical Chemistry*. **2020**, 877, 114538.
- [7] Wu, W. L.; Niu, D. J.; Zhu, J. F.; Gao, Y.; Wei, D.; Zhao, C. H.; Wang, C. W.; Wang, F.; Wang, L.; Yang, L. Q. Hierarchical architecture of Ti<sub>3</sub>C<sub>2</sub>@PDA/NiCo<sub>2</sub>S<sub>4</sub> composite electrode as high-performance supercapacitors. *Ceramics International*. **2019**, 45, 16261-16269.
- [8] Li, J.; Yuan, X. T.; Lin, C.; Yang, Y. Q.; Xu, L.; Du, X.; Xie, J. L.; Lin, J. H.; Sun, J. L. Achieving High Pseudocapacitance of 2D Titanium Carbide (MXene) by Cation Intercalation and Surface Modification. *Advanced Energy Materials*. **2017**, 7, 1-6.
- [9] Guo, J.; Zhao, Y. Y.; Liu, A. N.; Ma, T. L. Electrostatic self-assembly of 2D delaminated MXene (Ti<sub>3</sub>C<sub>2</sub>) onto Ni foam with superior electrochemical performance for supercapacitor. *Electrochimica Acta*. **2019**, 305, 164-174.
- [9] Yan, J.; Ren, C. E.; Maleski, K.; Hatter, C. B.; Anasori, B.; Urbankowski, P.; Sarycheva, A.; Gogotsi, Y. Flexible MXene/Graphene Films for Ultrafast Supercapacitors with Outstanding Volumetric Capacitance. *Advanced Functional Materials*. **2017**, 27, 1701264.
- [10] Song, J. R.; Hu, P. F.; Liu, Y.; Song, W. X.; Wu, X. Enhanced Electrochemical Performance of Co<sub>2</sub>NiO<sub>4</sub>/Ti<sub>3</sub>C<sub>2</sub>T<sub>x</sub> Structures through Coupled Synergistic Effects. *ChemistrySelect*. **2019**, 4, 12886-12890.
- [11] Zhao, R. Z.; Wang, M. Q.; Zhao, D. Y.; Li, H.; Wang, C. X.; Yin, L. W. Molecular-Level Heterostructures Assembled from Titanium Carbide MXene and Ni-Co-Al Layered Double Hydroxide Nanosheets for All-solid-state Flexible Asymmetric High-Energy Supercapacitors. *ACS Energy Letters*. **2017**, 3, 132-140.

- [12] Chen, W. W.; Peng, Y.; Qiu, Z. H.; Zhang, X.; Xu, H. J. 3D hierarchical  $\text{Ti}_3\text{C}_2\text{T}_x\text{@NiO}$ -reduced graphene oxide heterostructure hydrogel as free-standing electrodes for high performance supercapacitor. *Journal of Alloys and Compounds*. **2022**, 901, 163614.
- [13] Lee, K. H.; Oh, J.; Son, J. G.; Kim, H.; Lee, S. S. Nitrogen-Doped Graphene Nanosheets from Bulk Graphite using Microwave Irradiation. *ACS Appl Mater Interfaces*. **2014**, 6, 6361-6368.
- [14] Zheng, B.; Chen, T. W.; Xiao, F. N.; Bao, W. J.; Xia, X. H. KOH-activated nitrogen-doped graphene by means of thermal annealing for supercapacitor. *Journal of Solid State Electrochemistry*. **2013**, 17, 1809-1814.
- [15] Wen, P.; Gong, P. W.; Mi, Y. J.; Wang, J. Q.; Yang, S. R. Scalable fabrication of high quality graphene by exfoliation of edge sulfonated graphite for supercapacitor application. *RSC Advances*. **2014**, 4, 35914-35918.
- [16] Benedetti, M.; Girelli, C. R.; Antonucci, D.; De Pascali, S. A.; Fanizzi, F. P. New method for the synthesis of  $[\text{PtCl}\{\eta^1\text{-CH}_2\text{C(O)R}\}(\text{N-N})]$  ketonyl derivatives starting from the Zeise's salt. *Inorganica Chimica Acta*. **2014**, 413, 109-114.
- [17] Guo, J. R.; Xu, X. T.; Hill, J. P.; Wang, L. P.; Dang, J. J.; Kang, Y. Q.; Li, Y. L.; Guan, Y. S.; Yamauchi, Y. Graphene-carbon 2D heterostructures with hierarchically-porous P, N-doped layered architecture for capacitive deionization. *Chem Sci*. **2021**, 12, 10334-10340.
- [18] Lv, Y.; Gan, L. H.; Liu, M. X.; Xiong, W.; Xu, Z. J.; Zhu, D. Z.; Wright, D. S. A self-template synthesis of hierarchical porous carbon foams based on banana peel for supercapacitor electrodes. *Journal of Power Sources*. **2012**, 209, 152-157.
- [19] Qiu, B.; Pan, C. T.; Qian, W. J.; Peng, Y. J.; Qiu, L. H.; Yan, F. Nitrogen-doped mesoporous carbons originated from ionic liquids as electrode materials for supercapacitors. *Journal of Materials Chemistry A*. **2013**, 1, 6373-6378.
- [20] Zhao, H. Y.; Wang, L. X.; Jia, D. Z.; Xia, W.; Li, J.; Guo, Z. P. Coal based activated carbon nanofibers prepared by electrospinning. *J. Mater. Chem. A*. **2014**, 2, 9338-9344.
- [21] Shang, T. X.; Zhang, M. Y.; Jin, X. J. Easy procedure to prepare nitrogen-containing activated carbons for supercapacitors. *RSC Adv*. **2014**, 4, 39037-39044.
- [22] Yang, X. W.; Zhuang, X. D.; Huang, Y. J.; Jiang, J. Z.; Tian, H.; Wu, D. Q.; Zhang, F.; Mai, Y. Y.; Feng, X. L. Nitrogen-Enriched Hierarchically Porous Carbons Fabricated by Graphene Aerogel Templated Schiff-base Chemistry for High Performance Electrochemical Capacitors. *Polymer Chemistry*. **2015**, 6, 1088-1095.
- [23] Yi, H.; Wang, H. W.; Jing, Y. T.; Peng, T. Q.; Wang, X. F. Asymmetric supercapacitors based on carbon nanotubes@NiO ultrathin nanosheets core-shell composites and MOF-derived porous carbon polyhedrons with super-long cycle life. *Journal of Power Sources*. **2015**, 285, 281-290.
